# Supplementary material for: Precision synthesis of diblock copolymers via free radical photopolymerization
Source: Royal Society of Chemistry journal article supplement (doi:10.1039/d4cc03634d), 2024-01-01
Supplement: d4cc03634d1.pdf [file d4cc03634d1.pdf]

## Supporting Information

### Precision synthesis of diblock copolymers via free radical photopolymerization

Jingfang Li<sup>a,\*</sup>, Qilu Deng<sup>a</sup>, Zhihao Xing<sup>b</sup>, Jiabin Yu<sup>b</sup>, Wenjie Li<sup>b</sup>, Xianju Zhou<sup>a</sup>, Xiaoqun Zhu<sup>b,c</sup>, Jun Nie<sup>b,c</sup>

a. School of Science, Chongqing University of Posts and Telecommunications, Chongqing 400065, China

b. State Key Laboratory of Chemical Resource Engineering, Beijing Laboratory of Biomedical Materials, Beijing University of Chemical Technology, Beijing, 100029, China

c. Jiangsu Jicui Photosensitive Electronic Materials Research Institute limited company, Jiangsu, 214201, China

#### Corresponding Authors\*

E-mail: [lijf@cqupt.edu.cn](mailto:lijf@cqupt.edu.cn)

## Materials

N-methyl-2-pyrrole formaldehyde, tetrahydrofuran(THF, superdry), triethyl phosphoacetylacetate were obtained from Macklin. Lithium bis(trimethylsilyl)amide (LiHMDS), Dimethylaminopyridine(DMAP), 1-ethyl-3-(3-dimethylamino) carbodiimide hydrochloride(EDCI) were purchased from Aladdin. 2-Hydroxy-4-(2-hydroxyethoxy)-2-methylpropiophenone(Iragcure 2959) was sourced from JIURI NEW MATERIALS(Tianjin, China). Methyl alcohol, NaOH, dichloromethane, ethyl acetate, acetonitrile(ACN) and other developing solvents were obtained from Energy Chemical (Shanghai, China). Monomer including 1,6-hexadiol diacrylate(HDDA), phenyl methacrylate(PMA) and Butyl Methacrylate(BMA) purified and commercial photoinitiator CQ were supported by Jiangsu Jicui Photosensitive Electronic Materials Research Institute limited company(Jiangsu, China).

## Methods

### UV-Vis spectroscopy (UV-Vis)

UV-Vis absorption spectra were recorded on a GENESYS150 spectrophotometer (Thermo Fisher Scientific, American) using quartz cells with 1cm path length. The analysis covered a range of 200-600nm. A baseline correction was performed using ACN in a separate cell as a blank.

### Steady state photolysis study

Steady state photolysis studies related to compounds were performed in ACN upon the irradiation of LED@325nm(70mW/cm<sup>2</sup>), LED@465nm(70mW/cm<sup>2</sup>) and LED@275nm(15mW/cm<sup>2</sup>) in the absence of air at room temperature. The incident

light intensity was determined using radiometers provided by Photoelectric Instrument Factory of the Beijing Normal University. In addition, LED lamps were purchased from LAMPLIC(Shenzhen, China).

### **Nuclear Magnetic Resonance (NMR)**

NMR spectra were collected by an AVANCE III(400M Hz) spectrometer(Bruker, Germany) operating at room temperature using DMSO- $d_6$  as the solvent. Chemical shifts ( $\delta$ ) were determined following IUPAC guidelines and are expressed in parts per million (ppm), with reference to tetramethyl silane(TMS) for  $^1\text{H}$  and  $^{13}\text{C}$ . Multiplicities of the signals are identified by s(singlet), d(doublet), t(triplet), and m(multiplet). The absolute values of coupling constants (J) are denoted in Hertz (Hz).

### **EPR spin-trapping (EPR-ST)**

The electron paramagnetic resonance(EPR) spectrum was collected on a Bruker 500 spectrometer. The radicals aroused by initiating system CQ/PAA-2959 were generated upon LED@465nm without air at room temperature and trapped with agent N-tert-butyl- $\alpha$ -phenylnitroketone and upon LED@275nm at the same chemical environment condition trapped with agent 5,5-dimethyl-1-pyrrolin-n-oxide(DMPO), respectively. ACN was chosen as the solvent. The concentration of CQ/PAA-2959 was  $5 \times 10^{-3}$  mol/L.  $a_{\text{N}}$  and  $a_{\text{H}}$  stand for the hyperfine coupling constants for nitrogen and hydrogen, respectively.

### **Gel Permeation Chromatography(GPC)**

Volumetric exclusion chromatographic outflow curves were recorded on an Agilent PL-GPC50. The experimental temperature was maintained at 40 °C. DMF served as the solvent throughout the analysis, and the flow rate of the solvent was set at 1.0 mL/min. Polystyrenes were utilized as reference standards.

### **Photopolymerization kinetics**

A real-time Fourier transform IR (FT-IR) spectrometer (Nicolet 5700) equipped with an MCT/A KBr detector-beam splitter combination ( $650\text{-}4000\text{ cm}^{-1}$ ,  $4\text{ scans s}^{-1}$ ) was used to monitor the photopolymerization kinetics. Mixtures stirred for 10min including CQ(1wt%)/PAA-2959(2wt%)/HDDA were dropped onto a piece of KBr crystal with a thickness of  $2 \pm 0.1$  mm, covered by another clear piece of KBr crystal and then exposed upon LED@465nm or LED@275nm in the absence of air. The double bond conversion of the monomer HDDA was calculated based on the decrease in the area of the acrylate absorption peak at  $800\text{-}850\text{ cm}^{-1}$  using the following equation:

$$DC\%=[1-A_t/A_0]\times 100\%$$

where  $A_t$  corresponds to the area of the absorbance peak area of acrylate at 800-850  $\text{cm}^{-1}$  of at time  $t$  during the polymerization and  $A_0$  corresponds to the initial area of the absorbance peak before the polymerization.

## Synthesis

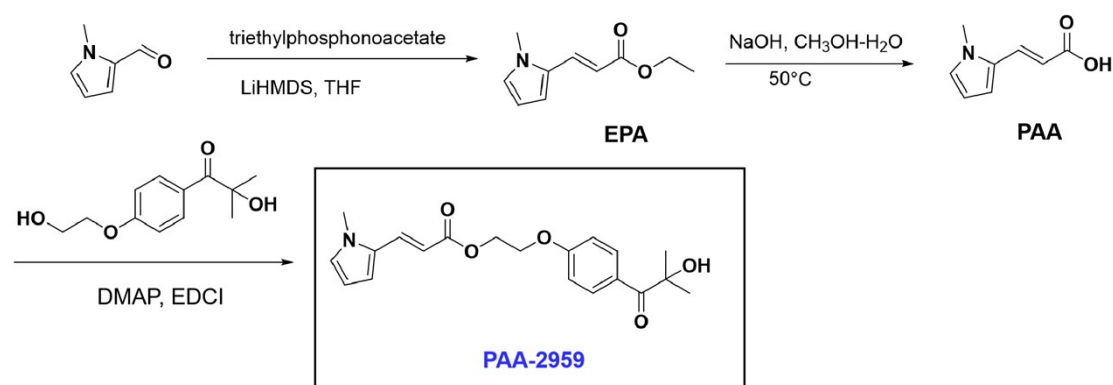

### Synthesis of EPA

LiHMDS (8.9 mL of a 1 M solution in THF, 8.9 mmol) was added to a solution of triethyl phosphonoacetate (1.78 mL, 8.9 mmol) in THF maintained at 0 °C. After 0.5 h at 0°C, N-methyl-2-pyrrole formaldehyde(0.75 mL, 7.0 mmol) was added and the solution was maintained at 0°C for 20 min then allowed to warm to room temperature. After 4 h, the reaction was quenched with NH<sub>4</sub>Cl (10mL of a saturated aqueous solution) and H<sub>2</sub>O (10mL) and the ensuing aqueous phase was extracted with CH<sub>2</sub>Cl<sub>2</sub> (2×40mL). The combined CH<sub>2</sub>Cl<sub>2</sub> extracts were washed by brine water, dried over anhydrous sodium sulfate and concentrated. The residue was purified by column chromatography using petroleum ether/ethyl acetate as eluent to obtain the intermediate **ethyl(E)-3-(1-methyl-1H-pyrrol-2-yl)acrylate(EPA)** as a colorless oil (1.14 g), yield: 91%.

<sup>1</sup>H-NMR (400 MHz, DMSO-*d*<sub>6</sub>) δ[ppm]=7.52 (dd,  $J = 15.7, 2.6$  Hz, 1H), 6.99 (s, 1H), 6.78 (s, 1H), 6.19 (dd,  $J = 15.7, 2.6$  Hz, 1H), 6.10 (d,  $J = 3.4$  Hz, 1H), 4.14 (q,  $J = 7.2$  Hz, 2H), 1.23 (t,  $J = 7.2$  Hz, 3H).

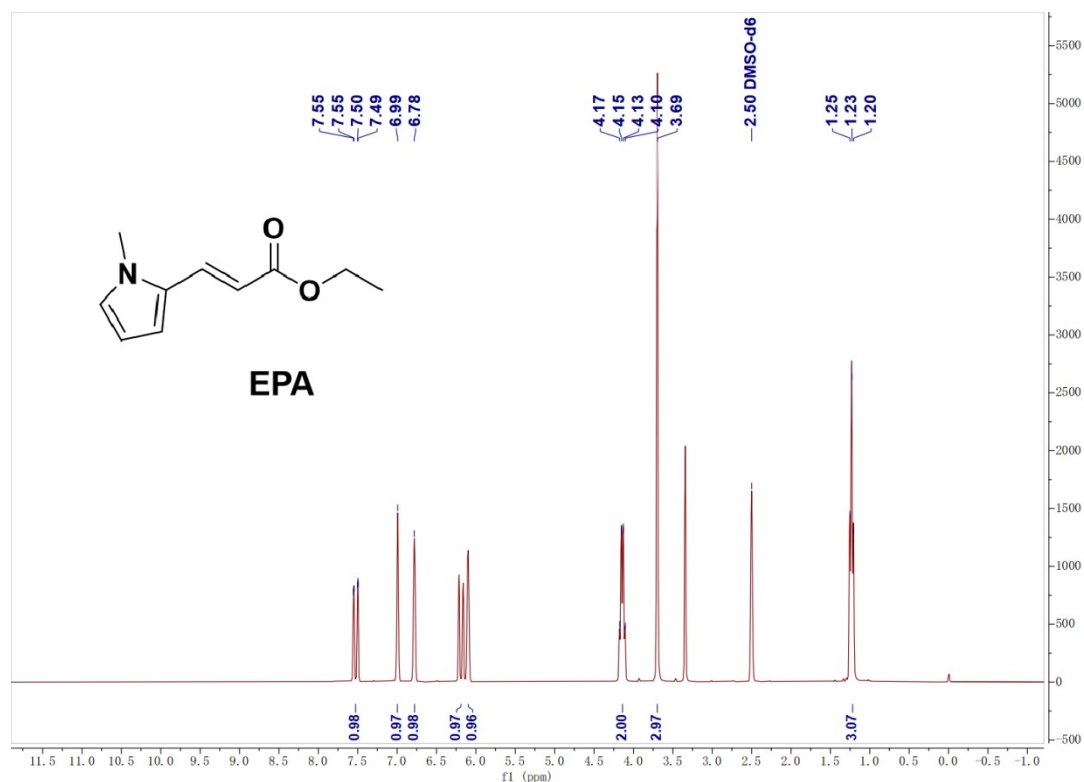

Figure S1.  $^1\text{H-NMR}$  of EPA

### Synthesis of PAA

To a solution of intermediate **EPA**(2.5 g, 13.9mmol) in methanol(20mL) and the solution of NaOH (2.78 g, 69.5 mmol)/H<sub>2</sub>O(10 mL) was added. The reaction mixture was stirred at 50 °C for 4 h until complete as it was indicated by TLC. Then the mixture was acidified by adding 1M HCl solution and precipitated a white solid product (**E**)-3-(1-methyl-1H-pyrrol-2-yl)acrylic acid(**PAA**) 1.90 g, yield: 90 %.

$^1\text{H-NMR}$  (400 MHz, DMSO-*d*<sub>6</sub>)  $\delta$ [ppm]=12.03 (s, 1H), 7.48 (d, J=16.0 Hz, 1H), 6.97 (s, 1H), 6.73 (s, 1H), 6.14-6.06 (m, 2H), 3.69 (s, 3H).

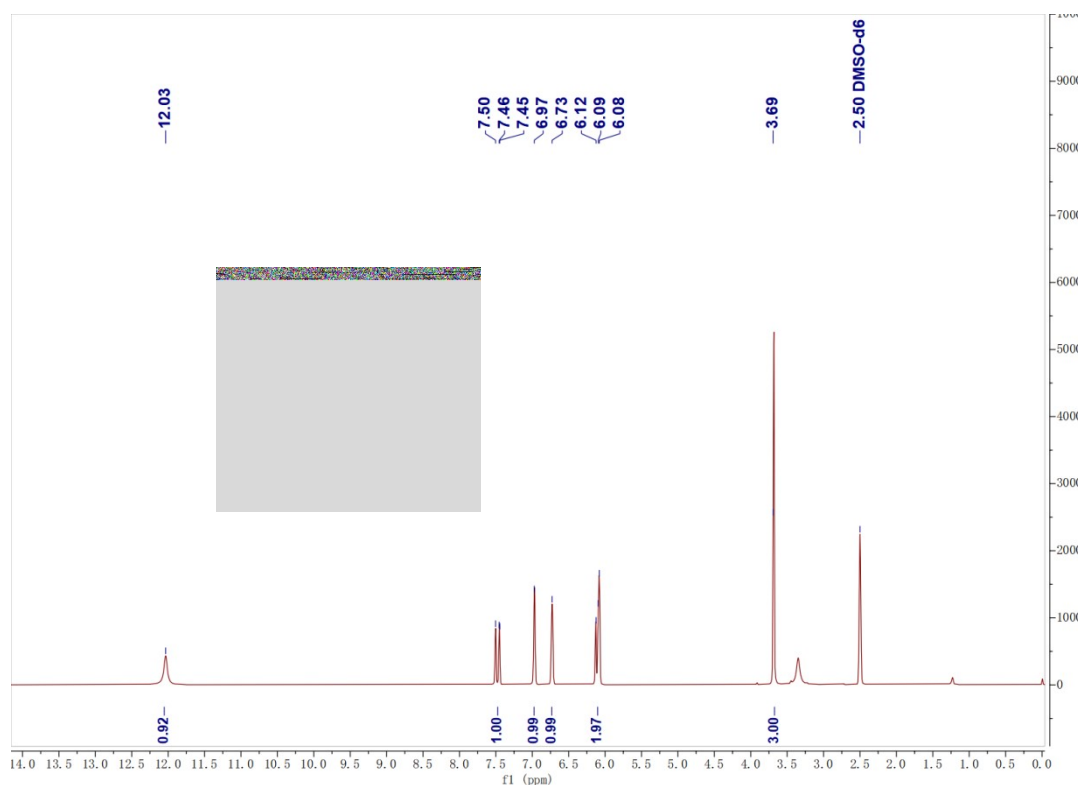

**Figure S2.**  $^1\text{H-NMR}$  of PAA

### Synthesis of PAA-2959

DMAP (201mg, 1.65mmol) and EDCI (315mg, 1.65mmol) were added into a solution of intermediate **PAA**(500mg, 3.31mmol) and Iragure 2959(1.11 g, 4.90mmol) in dichloromethane(20mL). The reactions mixture was stirred at room temperature for 6 h until complete as it was indicated by TLC. Then the mixture was quenched with water and extracted with dichloromethane. The organic layers were combined and dried over  $\text{Na}_2\text{SO}_4$ , filtered, and then concentrated under reduced pressure to give the crude product, which was purified by column chromatography eluting with petroleum ether/ethyl acetate (10/1, v/v) to give **2-(4-(2-hydroxy-2-methylpropanoyl)phenoxy)ethyl(E)-3-(1-methyl-1H-pyrrol-2-yl)acrylate(PAA-2959)** as a white solid product 968 mg, yield: 82 %.

$^1\text{H-NMR}$  (400 MHz,  $\text{DMSO-}d_6$ )  $\delta$ [ppm]=8.21 (d,  $J=8.9\text{Hz}$ , 2H), 7.56(d,  $J=15.6\text{ Hz}$ , 1H), 7.04(d,  $J=8.9\text{ Hz}$ , 1H), 7.00(d,  $J=2.1\text{Hz}$ , 1H), 6.85-6.77(m, 1H), 6.24(d,  $J=15.7\text{ Hz}$ , 1H), 6.10(m, 1H), 5.67(s, 1H), 4.51-4.41(m, 2H), 4.37-4.27(m, 2H), 3.69(s, 3H), 1.38(s, 6H).

$^{13}\text{C-NMR}$ (75 MHz,  $\text{DMSO}$ )  $\delta$ [ppm]=202.09, 166.92, 161.44, 133.22, 132.53, 128.54, 128.12, 127.79, 113.81, 112.84, 110.88, 109.11, 76.73, 66.18, 62.20, 33.97, 28.17;  
ESI-MS calculated for  $\text{C}_{20}\text{H}_{23}\text{NO}_5[\text{M}+\text{H}]^+$ : 358.2; Found  $\text{C}_{20}\text{H}_{23}\text{NO}_5[\text{M}+\text{Na}]^+$ : 380.6.

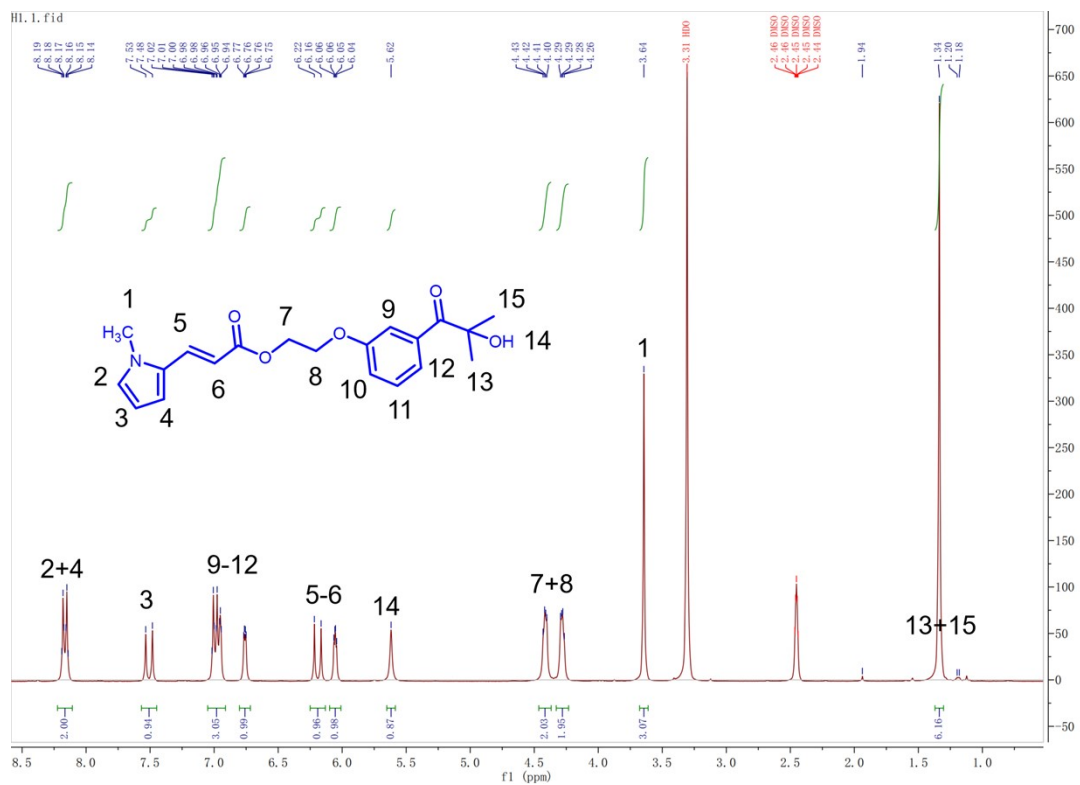

Figure S3.  $^1\text{H-NMR}$  of PAA-2959

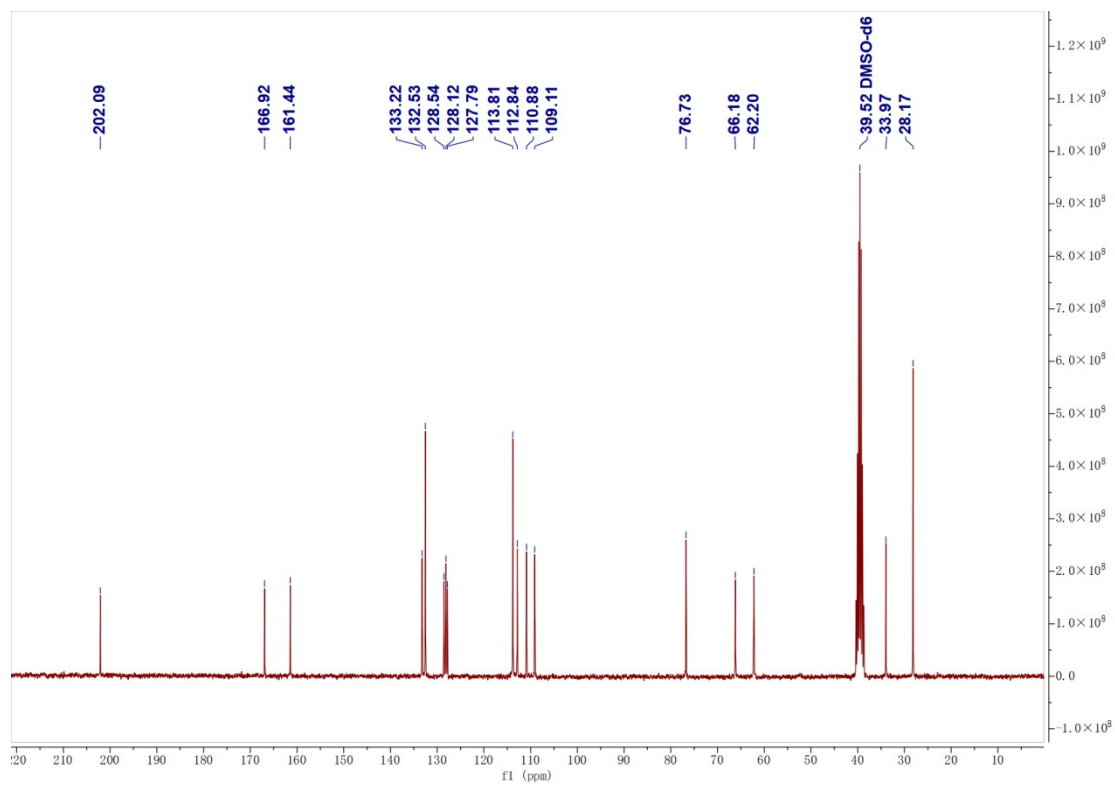

Figure S4  $^{13}\text{C-NMR}$  of PAA-2959

Spectrum RT 7.72 - 8.57 (34 scans) - Background Subtracted 4.77 - 6.66  
2024-05-05-1\_Scan1\_is1.dat;  
ESI + Settings for tune mix using source type ESI Positive.

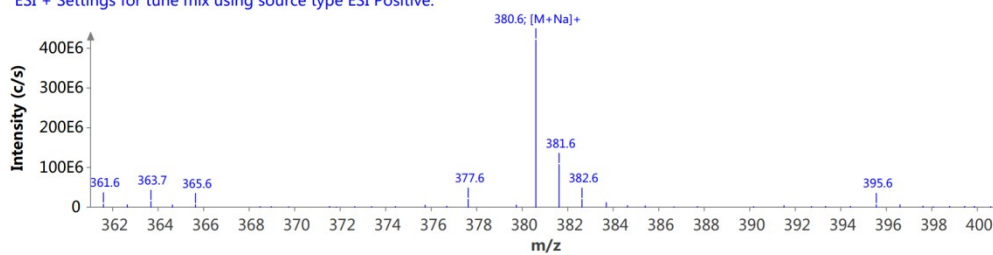

Figure S5. ESI-MS of PAA-2959

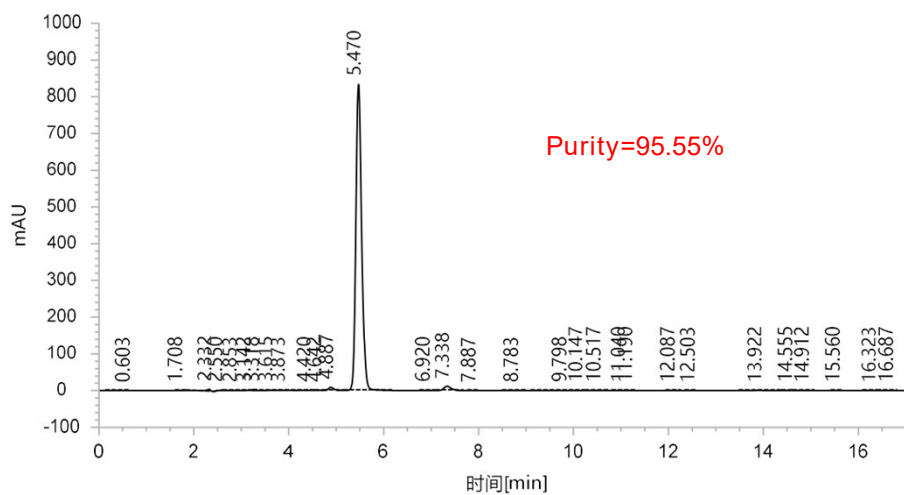

Figure S6. HPLC of PAA-2959

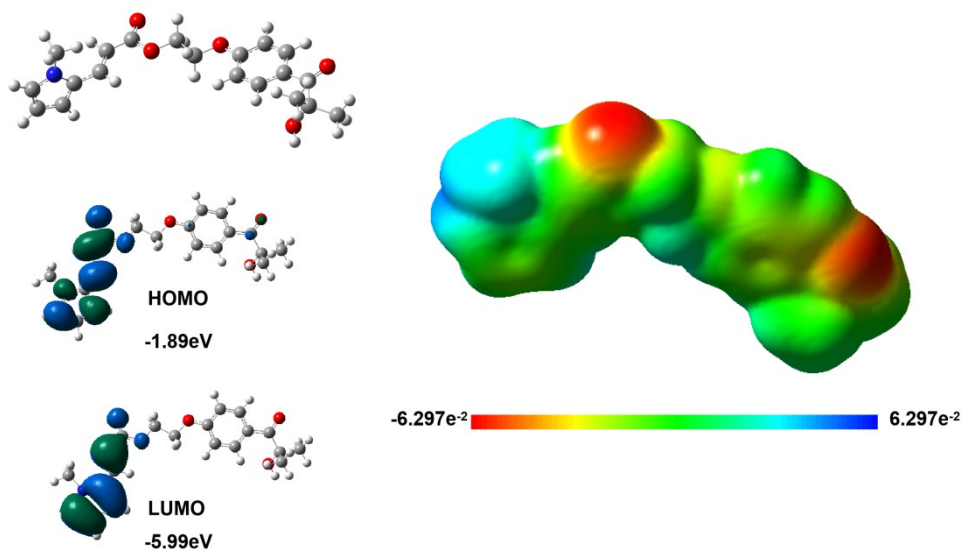

Figure S7. Optimized chemical structure, orbitals and electrostatic potential of PAA-2959

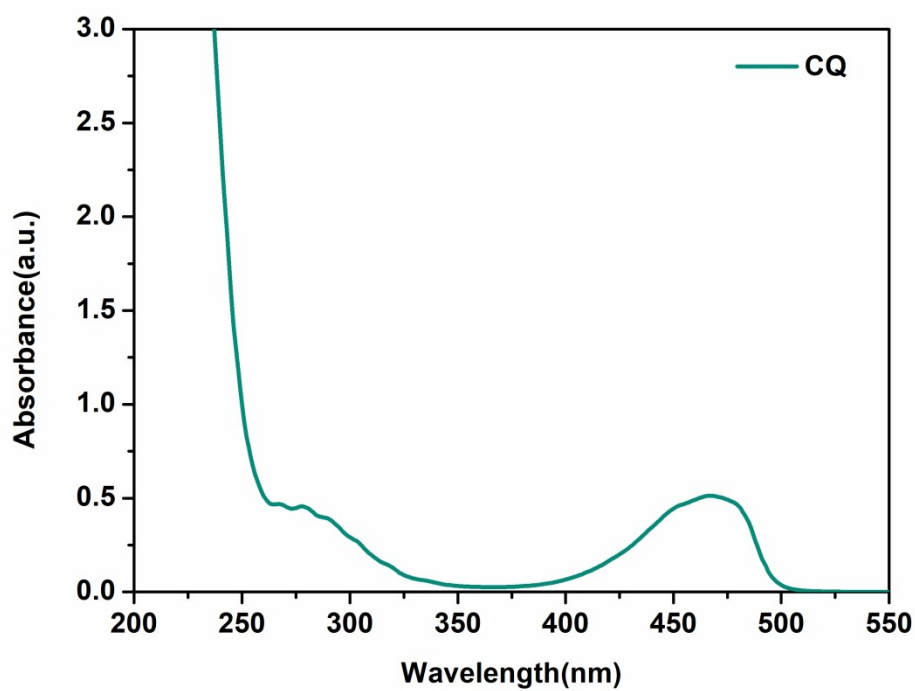

Figure S8. UV-Vis absorption spectrum of photoinitiator CQ( $1.25 \times 10^{-2}$  mol/L) in ACN

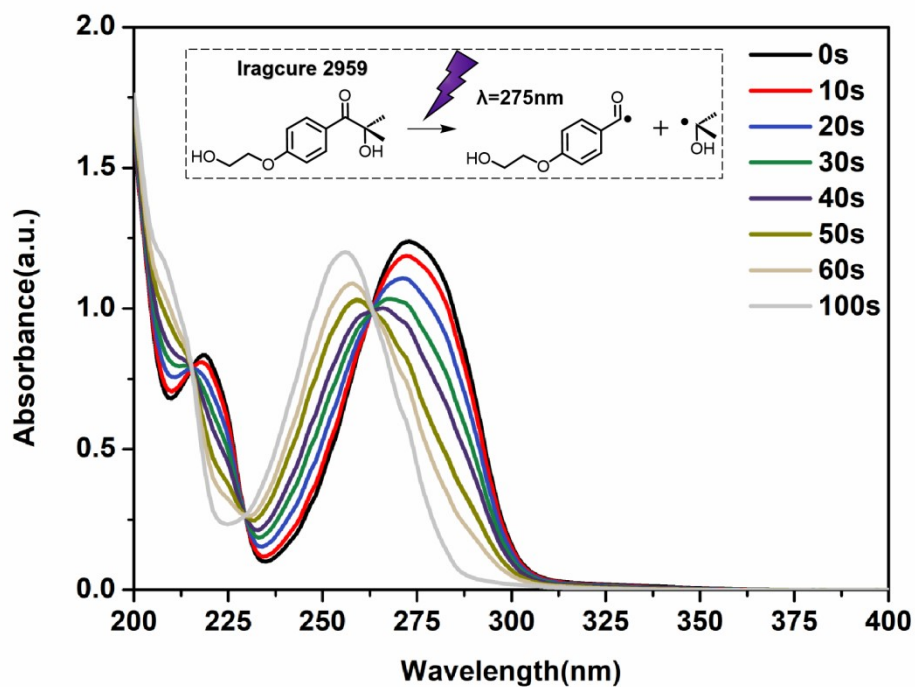

Figure S9. Steady state photolysis spectrum of Iragcure 2959 in ACN



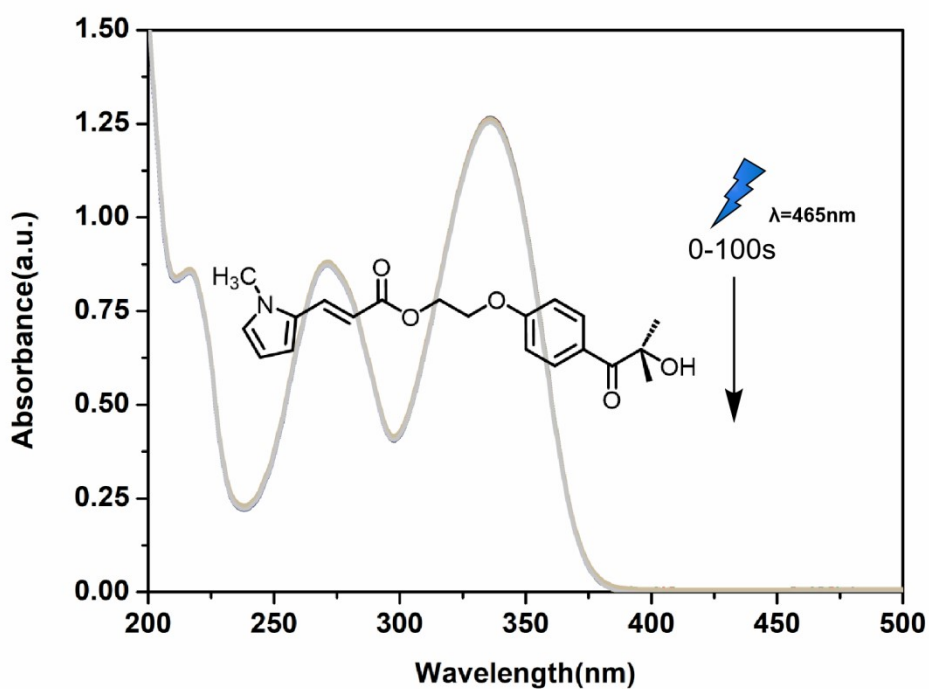

Figure S10. Steady state photolysis spectrum of PAA-2959( $2.5 \times 10^{-3}$  mol/L) in ACN under LED@465nm irradiation

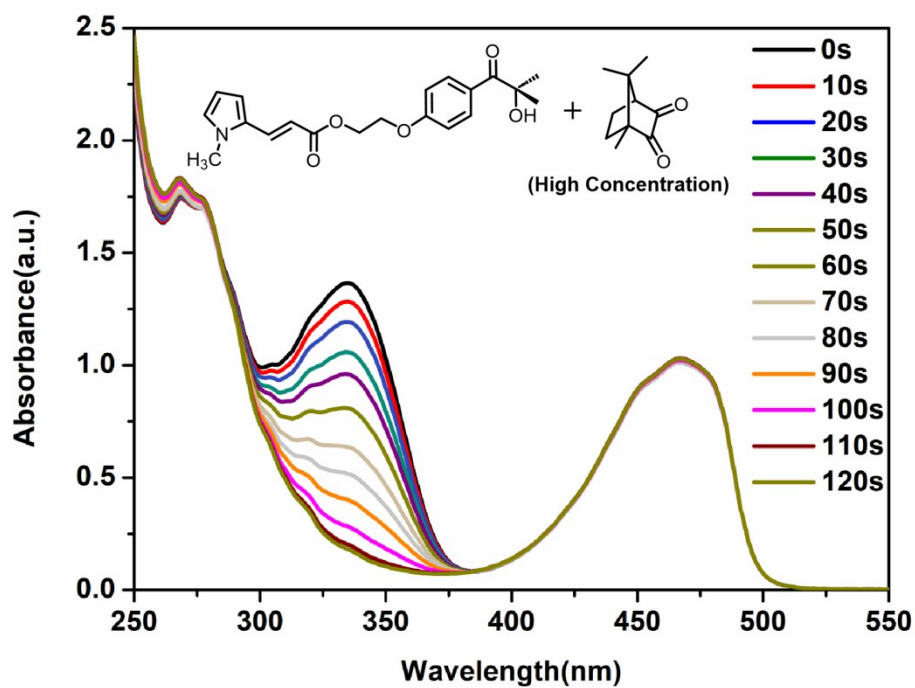

Figure S11. Steady state photolysis spectrum of initiating system PAA-2959( $4 \times 10^{-3}$  mol/L)/CQ( $2.5 \times 10^{-2}$  mol/L) in ACN under LED@275nm irradiation



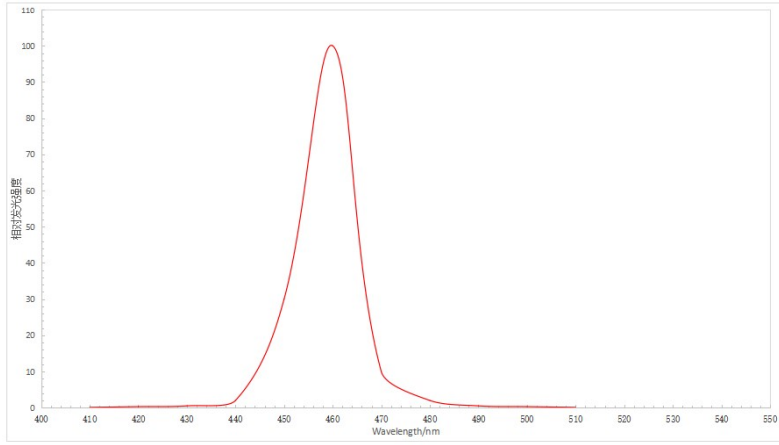

**Figure S12.** Emission spectra of LED@465nm

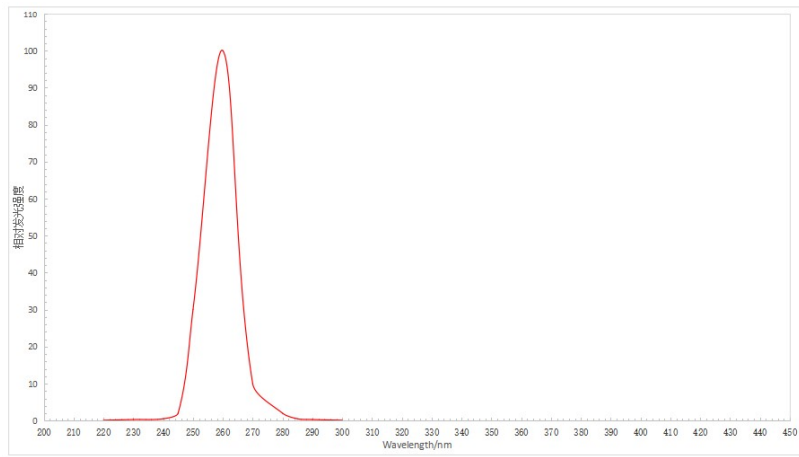

**Figure S13.** Emission spectra of LED@275nm
